# Supplementary material
Source: PubMed Central journal article supplement (PMC3907107)
Supplement: hdy201394x1.pdf [file hdy201394x1.pdf]

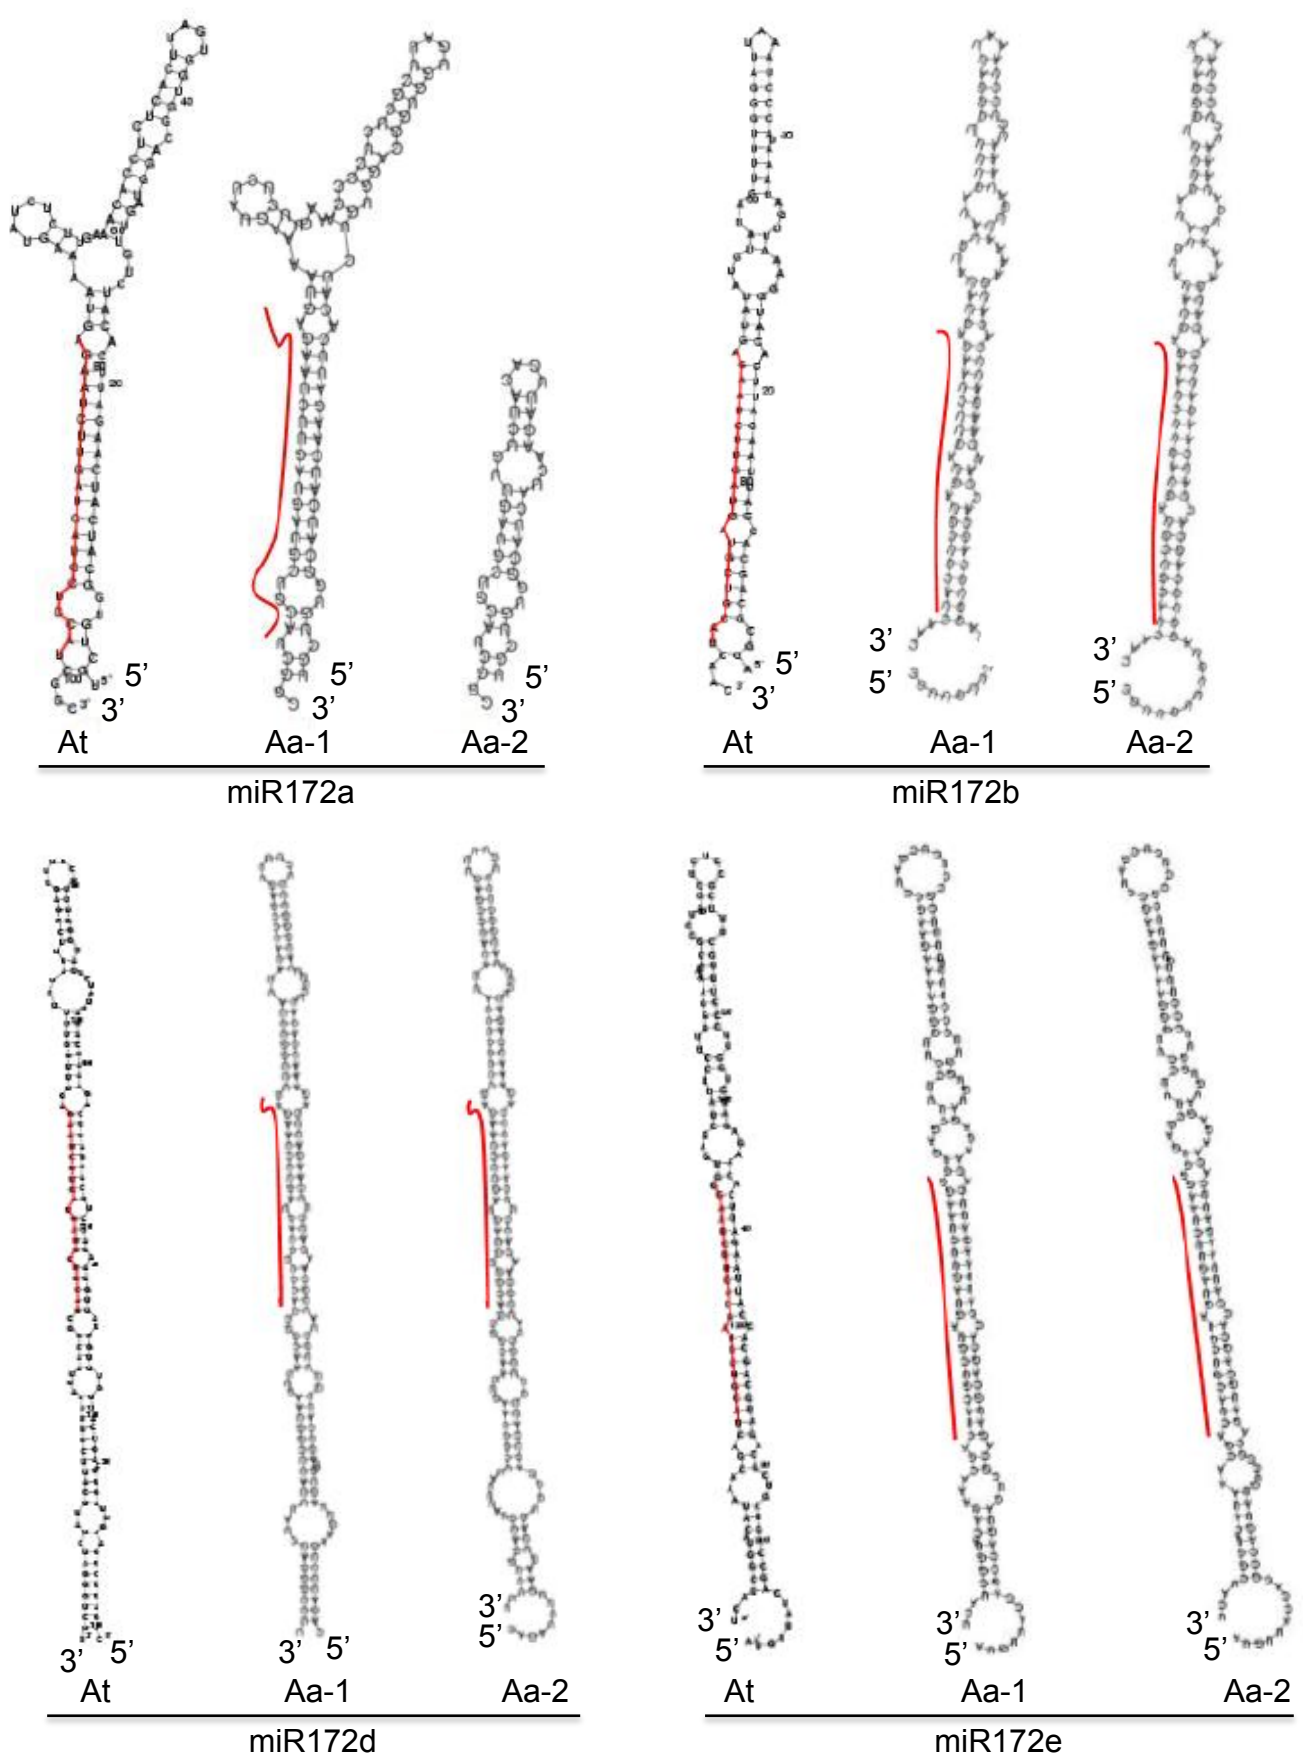

**Figure S1.** The stem-loop structures of MIR172 loci from *A. thaliana* (At) and *A. arenosa* (Aa) (MIR172a, b, d, and e) were predicted using RNA secondary structure prediction software the Vienna RNA package (<http://www.tbi.univie.ac.at/~ivo/RNA/>). The miR172 sequence in each locus was indicated by red lines on the structures. For each *AtMIR172*, there are two corresponding *AaMIR172* loci (Aa-1 and Aa-2).



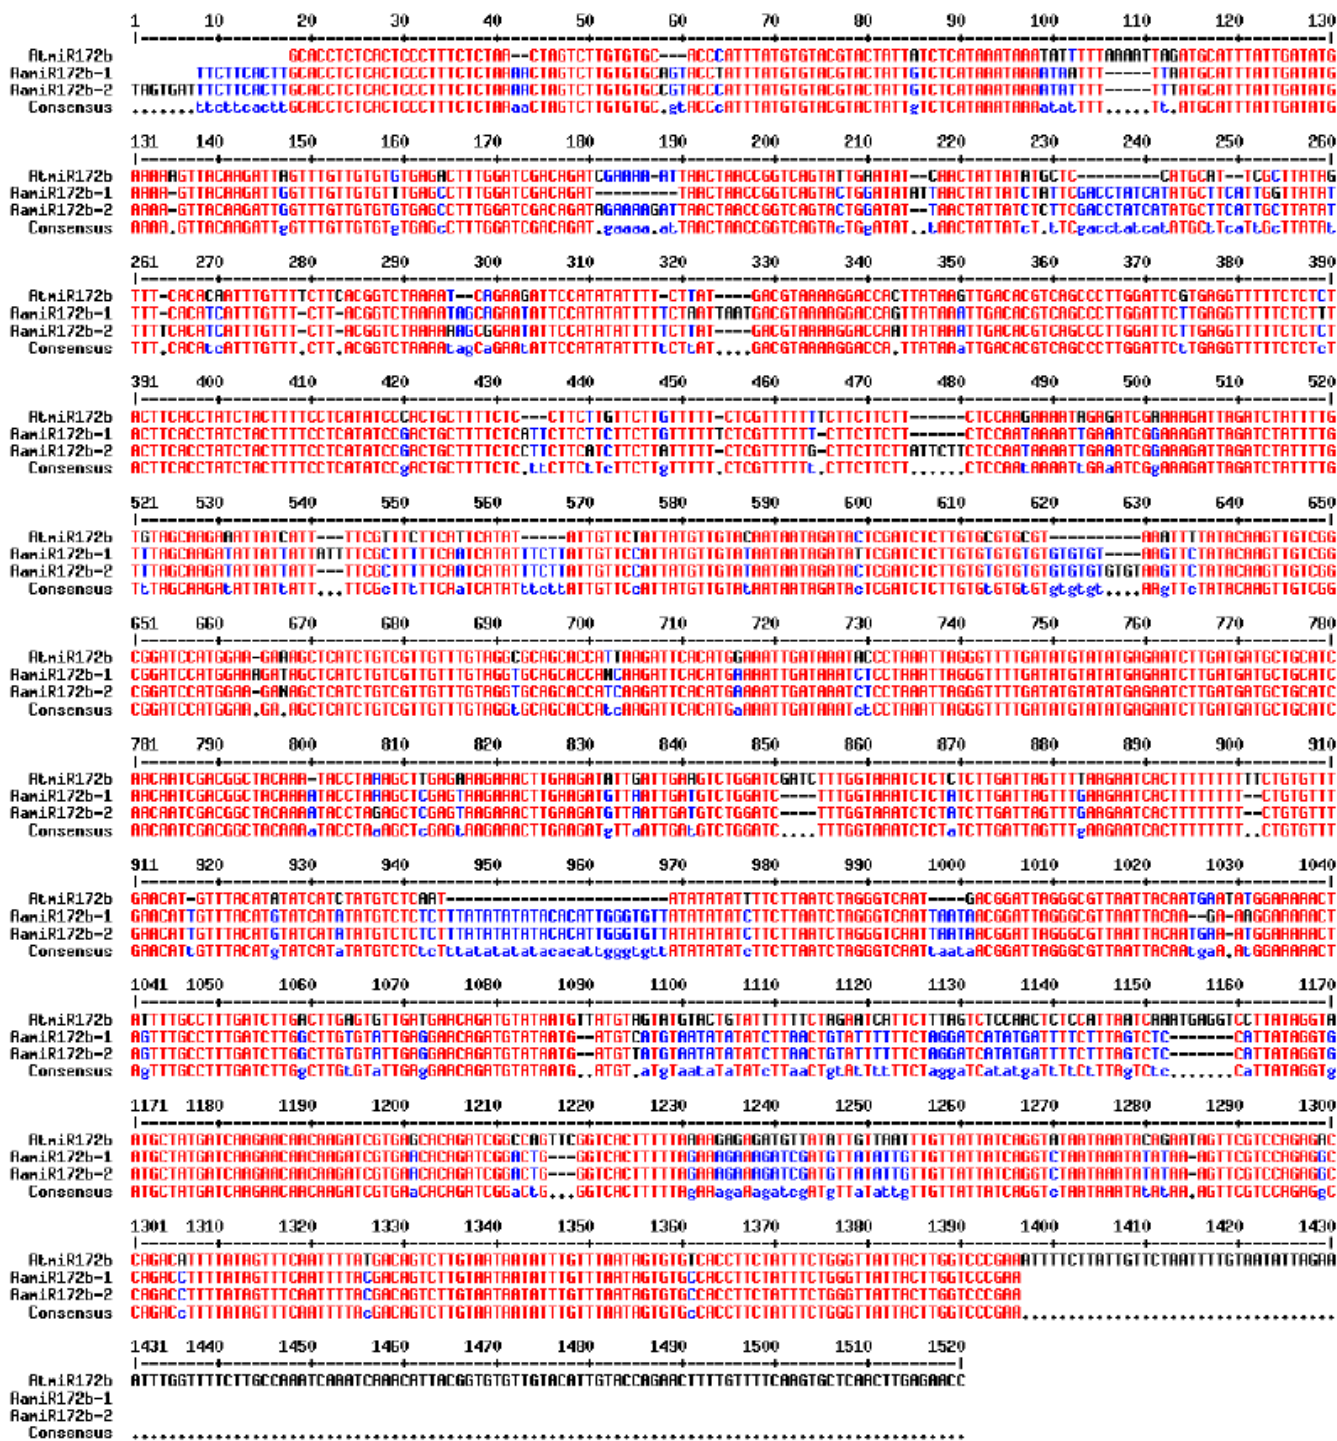

**Figure S3.** Sequence alignment of *A. arenosa* *MIR172b* locus with the corresponding *A. thaliana* *MIR172b*. Multiple sequence alignment performed using MultAlin (<http://prodes.toulouse.inra.fr/multalin/>).



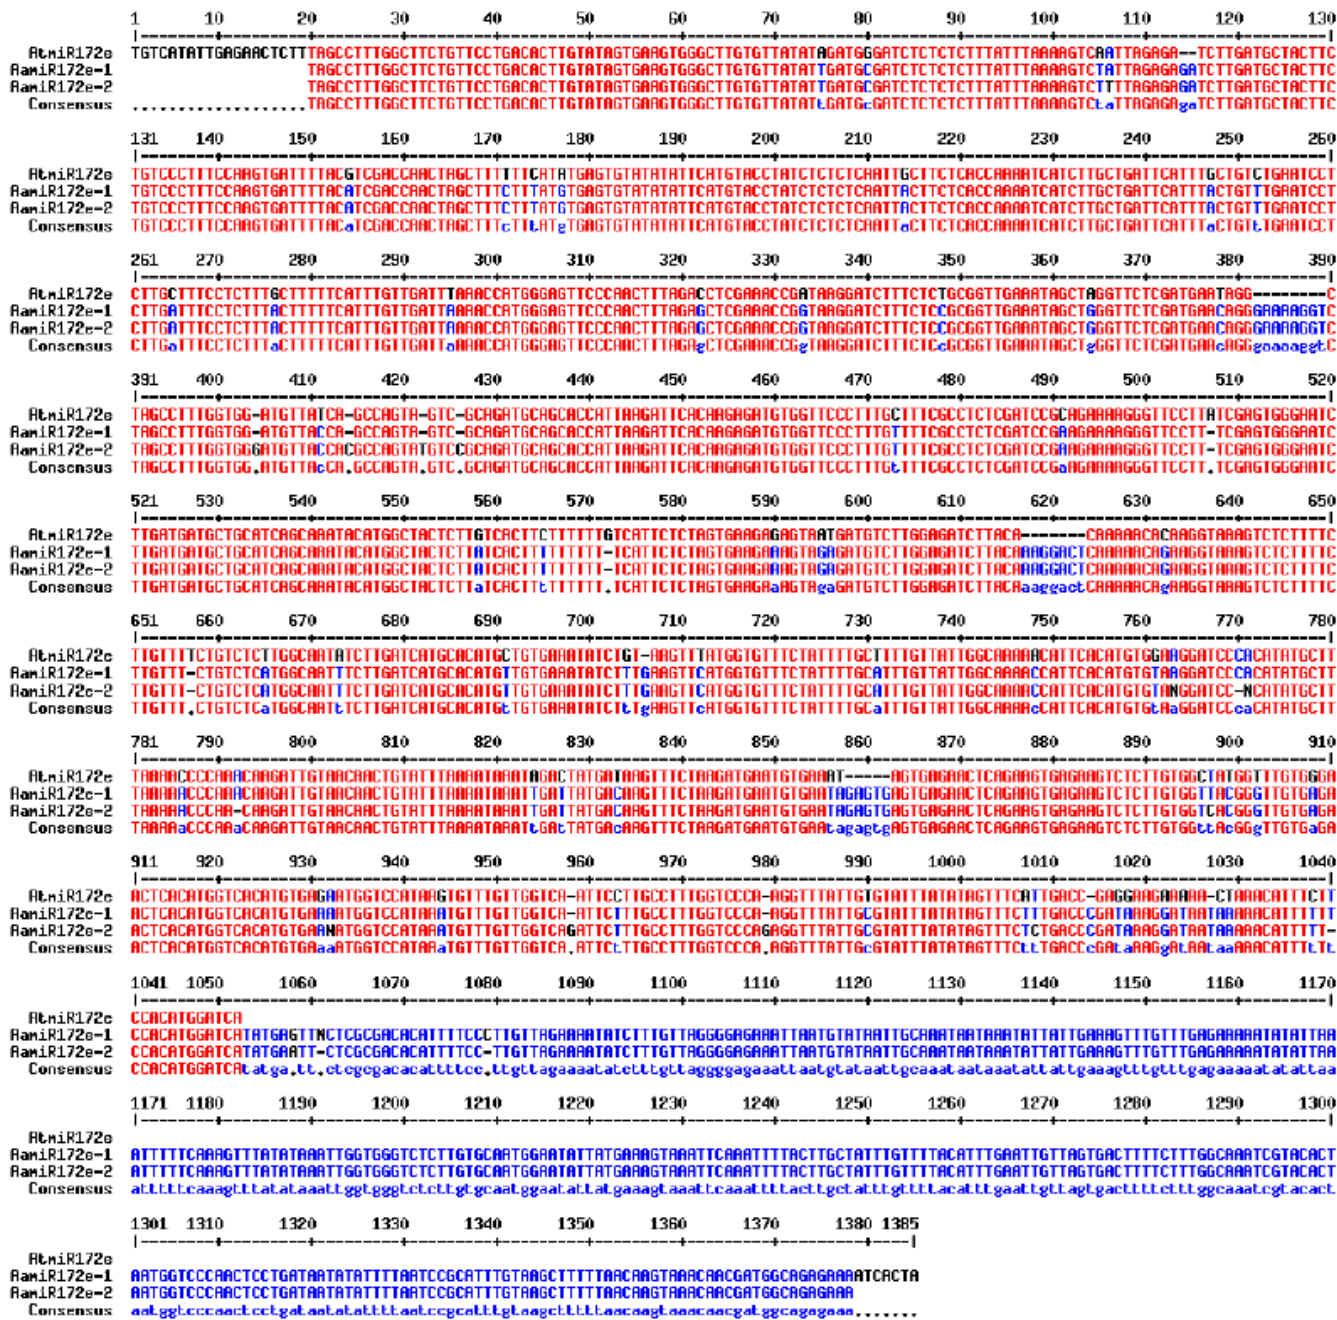

**Figure S5.** Sequence alignment of *A. arenosa* MIR172e locus with the corresponding *A. thaliana* MIR172e sequence. Multiple sequence alignment performed using MultAlin (<http://prodes.toulouse.inra.fr/multalin/>).
