# Supplementary material
Source: PubMed Central journal article supplement (PMC3907107)
Supplement: hdy201394x2.pdf [file hdy201394x2.pdf]

## Supporting Online Material

### Figures S1-5

**Figure S1.** The stem-loop structures of *MIR172* loci from *A. thaliana* (At) and *A. arenosa* (Aa) (*MIR172a*, *b*, *d*, and *e*).

**Figure S2.** Sequence alignment of *A. arenosa MIR172a* locus with the corresponding *A. thaliana MIR172a*.

**Figure S3.** Sequence alignment of *A. arenosa MIR172b* locus with the corresponding *A. thaliana MIR172b*.

**Figure S4.** Sequence alignment of *A. arenosa MIR172d* locus with the corresponding *A. thaliana MIR172d*.

**Figure S5.** Sequence alignment of *A. arenosa MIR172e* locus with the corresponding *A. thaliana MIR172e*.

## Tables 1-5

**Table S1.** DNA PCR primers used to amplify *A. arenosa* miRNA 172 loci

|         | Forward primers                | Reverse primers                |
|---------|--------------------------------|--------------------------------|
| MIR172a | 5'-TGTGAAAATAGCTGCCAACTTGC-3'  | 5'-GATCTCACCAGGTCTTTCTCTGGT-3' |
| MIR172b | 5'-TCGGGACCAAGTAATAACCCAGA-3'  | 5'-TCTTCACTTGACCTCTCACTCC-3'   |
| MIR172d | 5'-TGTCGTCTAACGGATAGCCAAGAG-3' | 5'-ACACGAAAAACAAGGGGTTTGGT-3'  |
| MIR172e | 5'-AGCCTTTGGCTTCTGTTCTGAC-3'   | 5'-TTCTCTGCCATCGTTGTTTACTTG-3' |

**Table S2.** DNA primers used for RACE-PCR amplification

| Primer Name        | Sequence                     |
|--------------------|------------------------------|
| nmiR172bRACE-3     | CAAGTTGTCGGCCGGATCCATGGAAGA  |
| nmiR172bRACE-nest3 | TGCTGCATCAACAATCGACGGCTACA   |
| nmiR172bRACE-5     | GTGCTGCACCTACAAACAACGACAGATG |
| nmiR172bRACE-nest5 | CCATGGATCCGCCGACAACCTTGTAT   |

**Table S3.** DNA primers used for SSCP and RT-PCR analyses

| Locus         | Forward primers                   | Reverse primers          |
|---------------|-----------------------------------|--------------------------|
| At5g04240sscp | CCATTGCGAAAAGGCTGAAGAA            | CCACATCCATCGACCTTGCATA   |
| At5g04250sscp | GGAAAATCAAGGGGAAGCCATT            | TCTGCTCATCCTCTGACGGTAA   |
| At5g04260sscp | TGATTCACCGAGCTTCTGAGCA            | GATCTCACCTTTGGTTCCCTCCA  |
| At5g04270sscp | TCGATGCAGAAAAGCTAATACCG           | TGGGACTCTCCTTTGTTGGCATA  |
| At5g04280sscp | TGCATGGAAGGGACTTTGGTGA            | GACCACCACCAGCAGAAGGACA   |
| At5g04290sscp | GCAGAGGAGGAAGGTCGTTTGA            | GCCCCATGCATTATCAGCTTCT   |
| At5g04310sscp | CATGGCCGGTGATTTGGATATT            | GGCGTCGTCACCAATACCTTCT   |
| At5g04320sscp | CATCCGAAAGCAGGCATGAAAC            | GCATTTTCGTCGCATCTTTACTC  |
| At5g04330sscp | TTCTCAACTCGCCCGTTTATCC            | TTTGGCGTCGGATGAGAAAAC    |
| At5g04340sscp | CTACTCACACCGCCTCCGTTCT            | CGTGACCTTGACCTGCCTTCTT   |
| At5g04347sscp | TCTTGGTCAAAAATGAGCTGAACA          | AGGTGTCTCGGGATGTTGTGTG   |
| At5g04350sscp | CGATTGTTATTGGCTTATGCATTG          | TCATCCCATTGGTACTTTTTGGTG |
| At5g04360sscp | GGCACTGACACTGACACCAACA            | CTGGAGACTTCGAGCGACATAGG  |
| At1g66690sscp | ACCCCGGCGCTAAAGTATCTTCT           | TCATTGTAGCGGATTTCCGGTTGT |
| At1g66700sscp | CTGCATTCCGGGTTTGGAGTTAT           | GGGAAGTTCACAATCGAGGCTTT  |
| At5g39610sscp | GACCGTCAAGCAACAGCTTCATT           | GCCGATGGTACAAAGGTTCCAAT  |
| At5g67180sscp | CCGGTTCGTCGGTAAAACGTAAC           | CGTGTCAAACGGGATGAGTCAAT  |
| At2g28550Aa   | CGG AGC ATG CCC GAG TTA TAA TAA T | TTGCATTGTCATTGGGAGGTTG   |
| At4g36920Aa   | GGA TTA GGT CAA ACC GGA ATG C     | CTGCAGCCAATTTTGATGAGGA   |
| At5g60120Aa   | CTT CCT TCT GCG TTC TTT TCA CC    | GCGGTTTCATGAGATTGTGTTGG  |

**Table S4.** DNA primers used for genomic bisulfite sequencing

| Name of the primers | Sequences                       |
|---------------------|---------------------------------|
| AamiR172bBSP-F      | GTGTTTATTTGAGAATAAGTTAGATTTAGT  |
| AamiR172bBSP-R      | AAAATAAAATATTTATAAAAACATACAATA  |
| AamiR172bBSP-Fnest  | TTATTTGAGAATAAGTTAGATTTAGTGTT   |
| AamiR172bBSP-Rnest  | CCAAATATTCATTAATATAATAACTATC    |
| AtmiR172bBSP-F      | TATTTATTTGAGAATAAGGGATATTTAGTG  |
| AtmiR172bBSP-R      | AAAAAATAAAATATAATATTTATAAAAACA  |
| AtmiR172bBSP-Fnest  | ATTATTAATAAAAAGAAATATTGTGATATTT |
| AtmiR172bBSP-Rnest  | CCATATTTATAATTCATTATCTCTAAATC   |

**Table S5.** Percentage of methylated CpG sites in the promoter regions of *A. thaliana* (At) and *A. arenosa* (Aa) *MIR172b* loci

|         | <i>AtMIR172b</i> |        |        |        | <i>AaMIR172b</i> |        |  |  | Methylation (%) |
|---------|------------------|--------|--------|--------|------------------|--------|--|--|-----------------|
|         | CG (1)           | CG (2) | CG (3) | CG (4) | CG (1)           | CG (2) |  |  |                 |
| At      | 0/50             | 0/50   | 0/50   | 0/50   |                  |        |  |  | 0               |
| Aa      |                  |        |        |        | 9/50             | 5/50   |  |  | 18              |
| Allo-At | 0/50             | 0/50   | 0/50   | 0/50   |                  |        |  |  | 0               |
| Allo-Aa |                  |        |        |        | 19/50            | 15/50  |  |  | 38              |
| As-At   | 0/50             | 0/50   | 0/50   | 0/50   |                  |        |  |  | 0               |
| As-Aa   |                  |        |        |        | 25/50            | 20/50  |  |  | 50              |

Note: % of methylation = total number of sequences containing methylated CG sites/total number of sequences. There are four CG sites in *AtMIR172b* and two in *AaMIR172b*.

Allo-At, AlloAa, As-At, and As-Aa indicate *A. thaliana* (At) and *A. arenosa* (Aa) alleles in resynthesized allotetraploid (Allo) and natural allotetraploid *A. suecica* (As), respectively.

The CHG site was not methylated (data not shown)

ND: not determined.
